# Supplementary material
Source: PubMed Central journal article supplement (PMC6498855)
Supplement: NIHMS1511842-supplement-4.pdf [file NIHMS1511842-supplement-4.pdf]

A.

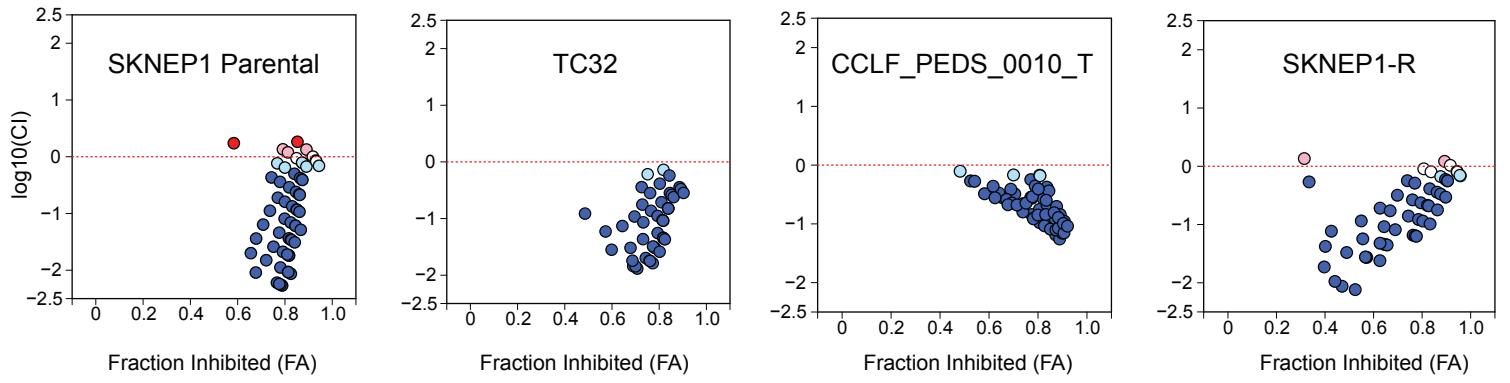

| Combination effect  | CI range     | log <sub>10</sub> (CI) range |
|---------------------|--------------|------------------------------|
| ● Strong antagonism | ≥ 1.4        | ≥ 0.146                      |
| ○ Antagonism        | ≥ 1.2, < 1.4 | ≥ 0.08, < 0.146              |
| ○ Nearly additive   | ≥ 0.8, < 1.2 | ≥ -0.097, < 0.08             |
| ○ Synergy           | ≥ 0.6, < 0.8 | ≥ -0.2, < -0.097             |
| ● Strong synergy    | < 0.6        | < -0.2                       |

B.

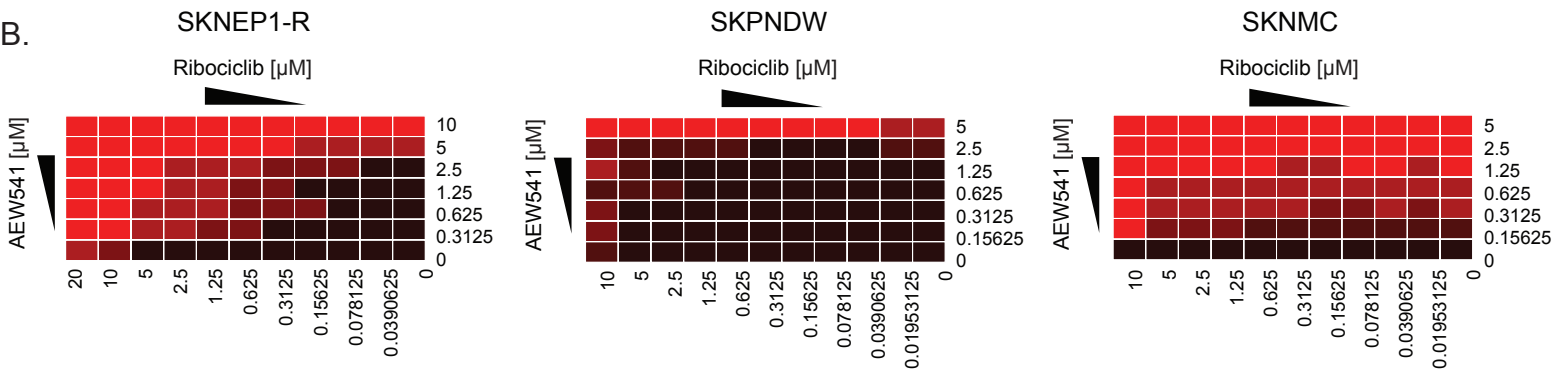

C.

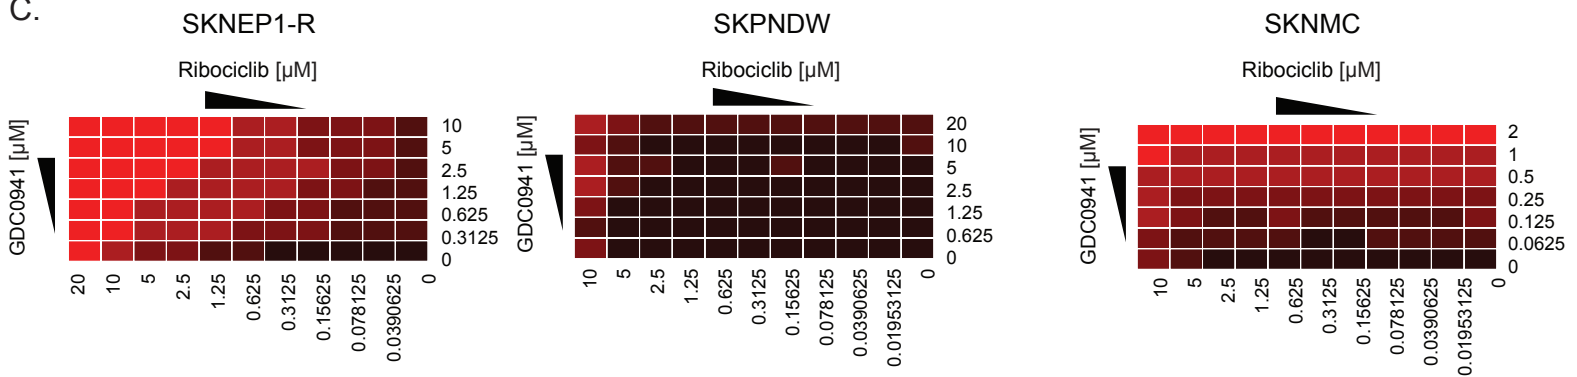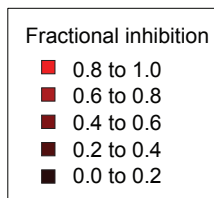

Supplemental Figure 3 (Related to Figure 3)
