# Supplementary material
Source: PubMed Central journal article supplement (PMC6498855)

A.

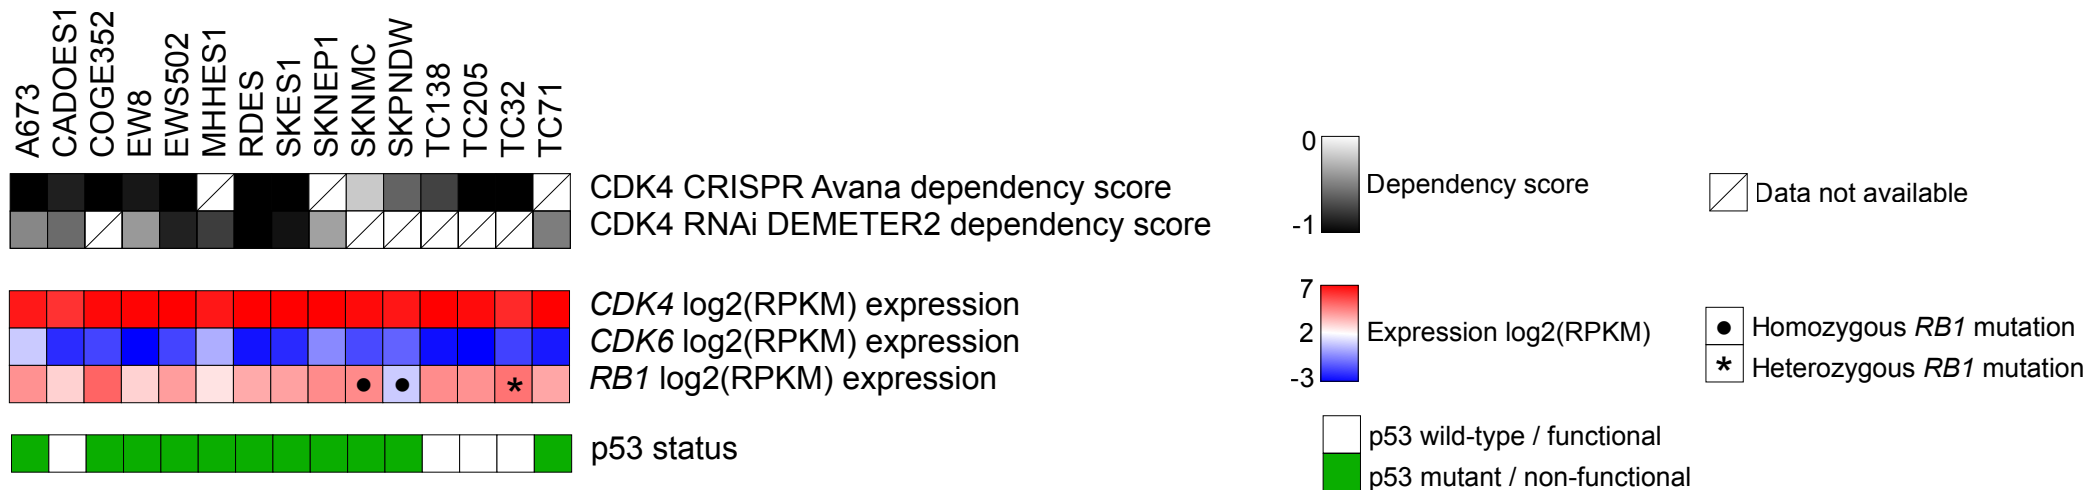

B.

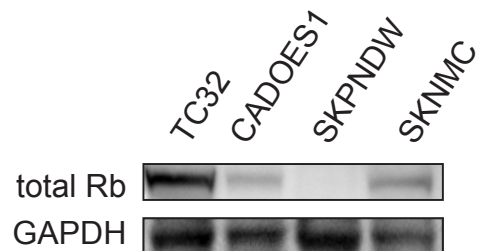

C.

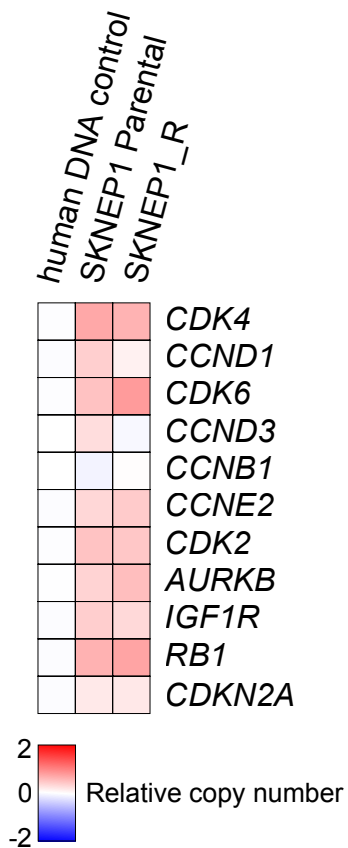

D.

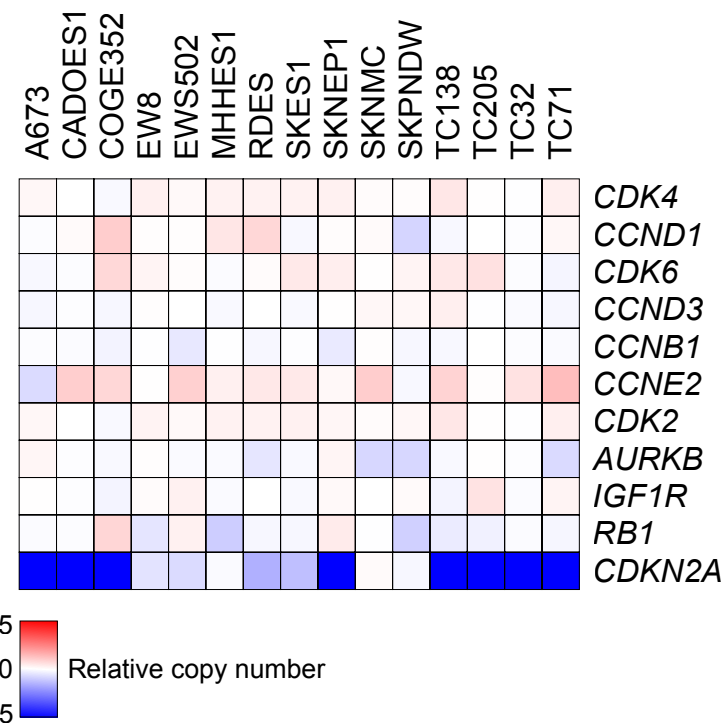

Supplement: NIHMS1511842-supplement-2.pdf [file NIHMS1511842-supplement-2.pdf]

A.

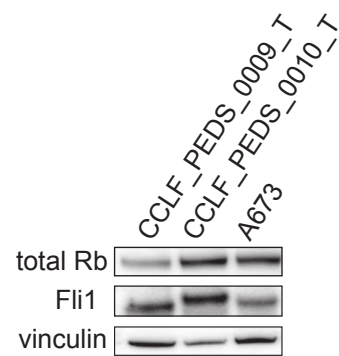

B.

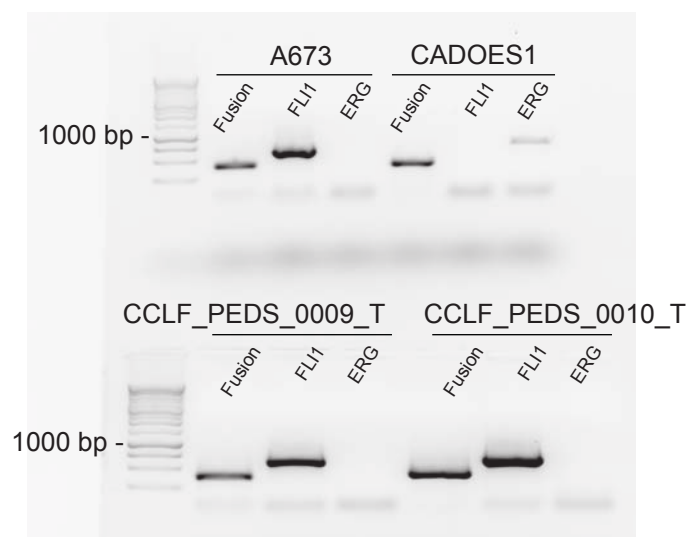

Supplement: NIHMS1511842-supplement-3.pdf [file NIHMS1511842-supplement-3.pdf]

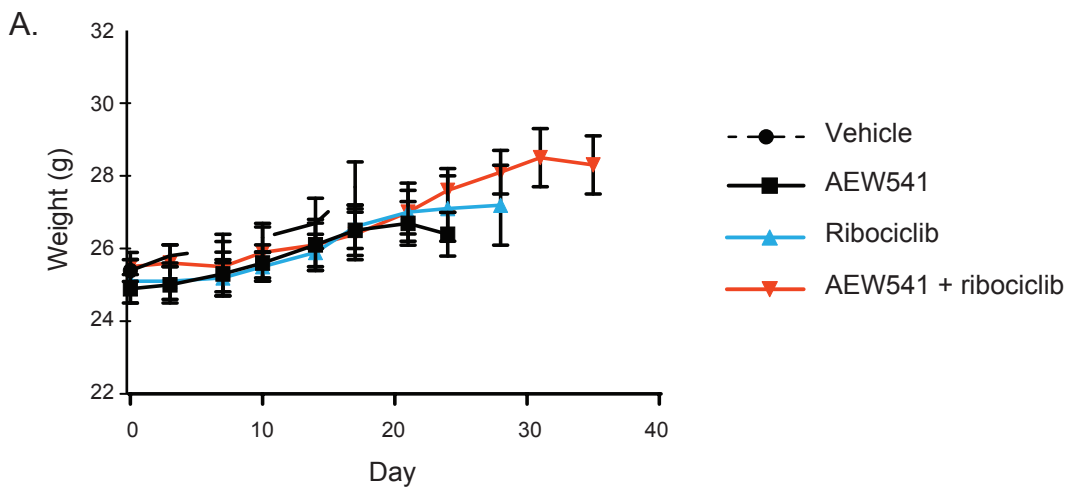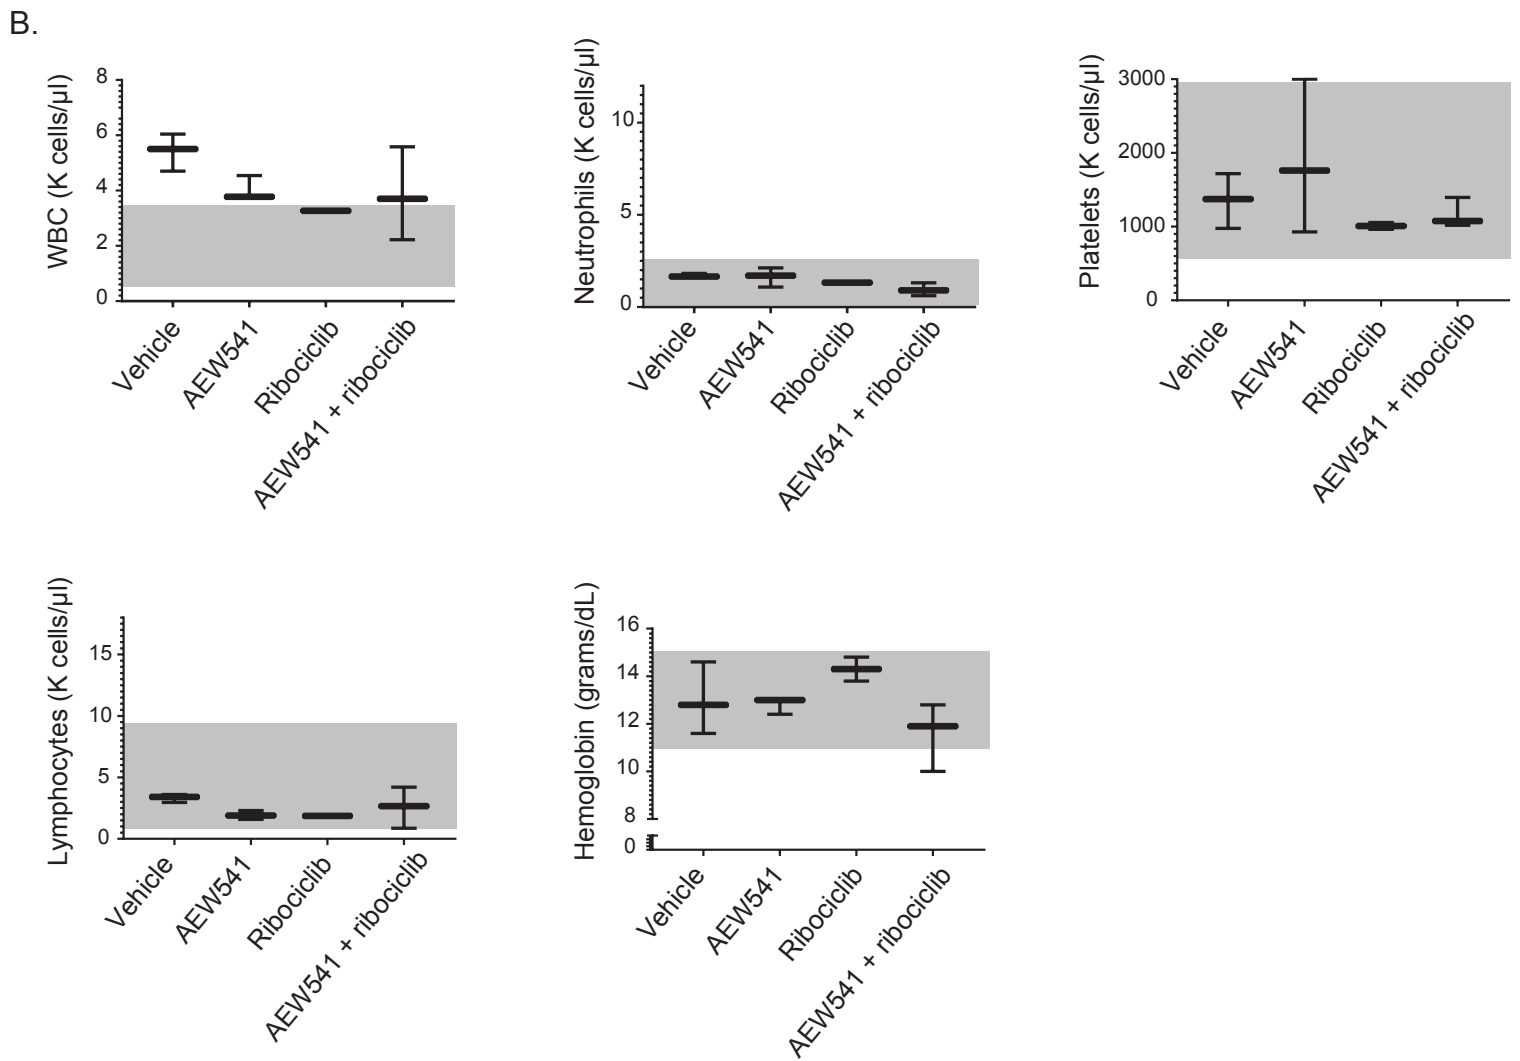

Supplement: NIHMS1511842-supplement-5.pdf [file NIHMS1511842-supplement-5.pdf]

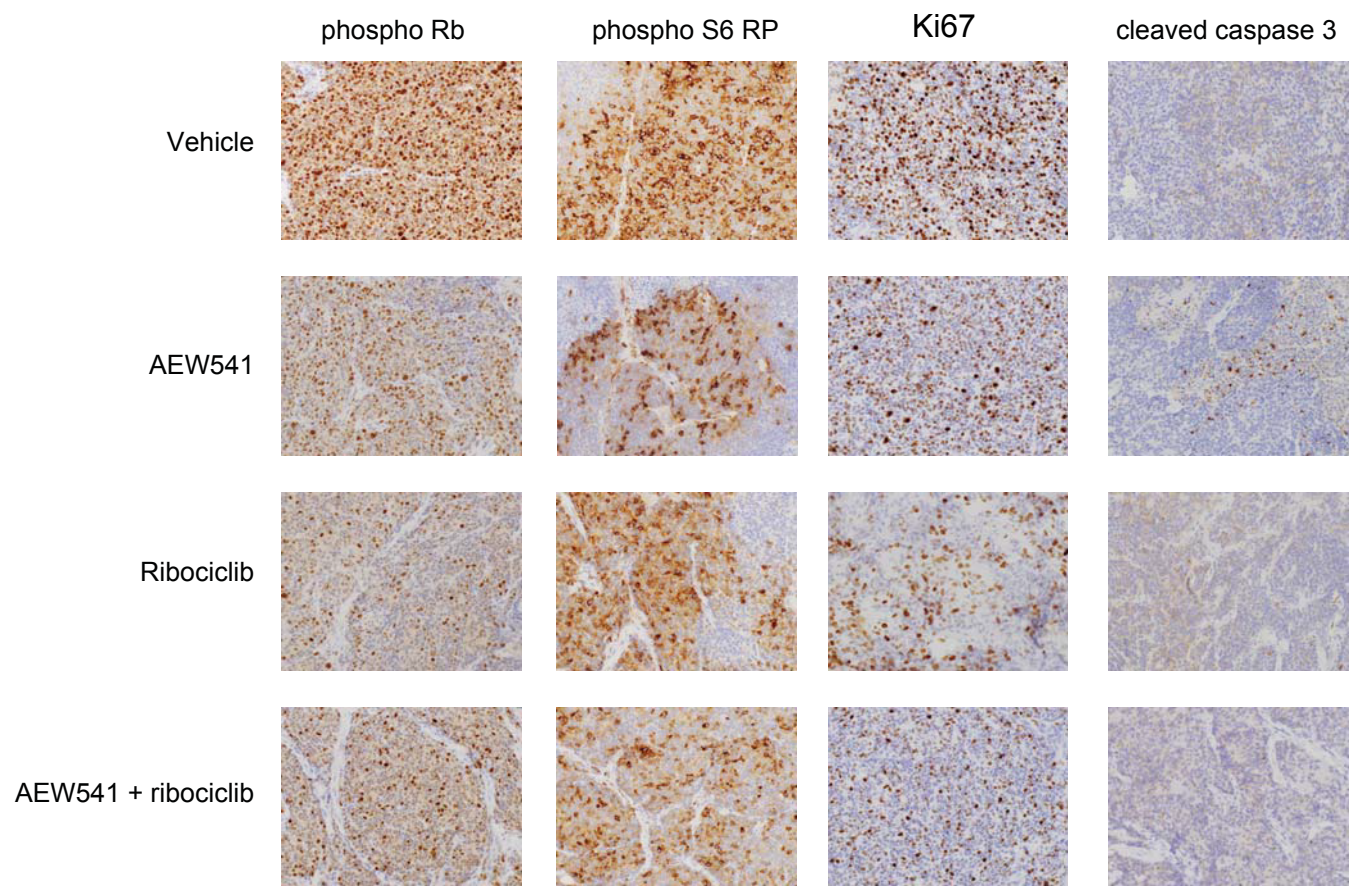

Supplemental Figure 5 (Related to Figure 6)

Supplement: NIHMS1511842-supplement-6.pdf [file NIHMS1511842-supplement-6.pdf]
